# Supplementary material for: A novel microextraction technique aided by air agitation using a natural hydrophobic deep eutectic solvent for the extraction of fluvastatin and empagliflozin from plasma samples: application to pharmacokinetic and drug–drug interaction study
Source: Royal Society of Chemistry journal article supplement (doi:10.1039/d3ra05929d), 2023-01-01
Supplement: d3ra05929d1.pdf [file d3ra05929d1.pdf]

## Supplementary Data

### **A novel microextraction technique aided by air agitation using a natural hydrophobic deep eutectic solvent for the extraction of fluvastatin and empagliflozin from plasma samples: Application to pharmacokinetic and drug-drug interaction study**

**Khalid Alhazzani<sup>a</sup>, Ahmed Z. Alanazi<sup>a</sup>, Aya M. Mostafa<sup>b,c</sup>, James Barker<sup>b</sup>, Mohamed M. El-Wekil<sup>c</sup>, Al-Montaser Bellah H. Ali<sup>c\*</sup>**

<sup>a</sup> Department of Pharmacology and Toxicology, College of Pharmacy, King Saud University, Riyadh, Saudi Arabia

<sup>b</sup> School of Life Sciences, Pharmacy, and Chemistry, Kingston University, Kingston-upon-Thames, London KT1 2EE, UK.

<sup>c</sup> Department of Pharmaceutical Analytical Chemistry, Faculty of Pharmacy, Assiut University, Assiut, Egypt.

\*e-mail: Almontaser\_bellah@aun.edu.eg

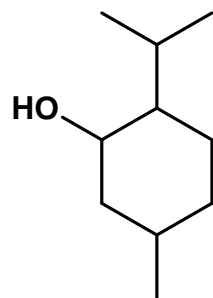

**Menthol**

**4**

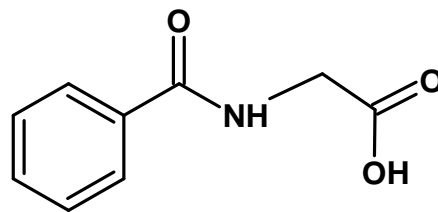

**Hippuric acid**

**1**

**:**

**Fig. S1.** Chemical structure of NDES

**Table S1.** Preparation of hydrophobic DESs.

| <b>HBD</b>    | <b>HBA</b> | <b>Mole ratio<br/>(HBD: HBA)</b> | <b>Physical state</b> | <b>Extraction recovery (%)</b> |            |
|---------------|------------|----------------------------------|-----------------------|--------------------------------|------------|
|               |            |                                  |                       | <b>FLV</b>                     | <b>EMP</b> |
| Hippuric acid | Menthol    | 1:1                              | Tubid                 | -                              | -          |
| Hippuric acid | Menthol    | 1:3                              | Tubid                 | -                              | -          |
| Hippuric acid | Menthol    | 1:4                              | Clear                 | 96.0                           | 92.0       |
| Hippuric acid | Thymol     | 1:1                              | Tubid                 | -                              | -          |
| Hippuric acid | Thymol     | 1:3                              | Tubid                 | -                              | -          |
| Hippuric acid | Thymol     | 1:4                              | Tubid                 | -                              | -          |
| Butyric acid  | Menthol    | 1:1                              | Clear                 | 62.0                           | 79.0       |
| Butyric acid  | Menthol    | 1:3                              | Clear                 | 56.0                           | 84.0       |
| Butyric acid  | Menthol    | 1:4                              | Clear                 | 51.0                           | 87.0       |

**Table S2.** The experimental levels of the factors used in the central composite design.

| <b>Factor</b>                         | <b>Levels of factors</b>                    |                           |                   |                            |                                          |
|---------------------------------------|---------------------------------------------|---------------------------|-------------------|----------------------------|------------------------------------------|
|                                       | <b>Low axial<br/>(-<math>\alpha</math>)</b> | <b>Low factorial (-1)</b> | <b>Center (0)</b> | <b>High factorial (+1)</b> | <b>High axial (+<math>\alpha</math>)</b> |
| <b>Sample pH</b>                      | 3                                           | 4                         | 5                 | 6                          | 7                                        |
| <b>DES volume</b>                     | 50                                          | 100                       | 200               | 250                        | 250                                      |
| <b>Centrifugation time</b>            | 5                                           | 10                        | 15                | 20                         | 25                                       |
| <b>Number of air-agitation cycles</b> | 2                                           | 4                         | 6                 | 8                          | 10                                       |

**Table S3.** CCD matrix and the obtained extraction recoveries.

| <b>Run</b> | <b>A: pH</b> | <b>B: NDES<br/>volume<br/>(<math>\mu</math>L)</b> | <b>C:<br/>Centrifugation<br/>time (min.)</b> | <b>D: Air-agitation<br/>cycles</b> | <b>Recovery<br/>FLV (%)</b> | <b>Recovery<br/>EMP (%)</b> |
|------------|--------------|---------------------------------------------------|----------------------------------------------|------------------------------------|-----------------------------|-----------------------------|
| 1          | 4            | 200                                               | 20                                           | 4                                  | 96                          | 88                          |
| 2          | 5            | 150                                               | 15                                           | 6                                  | 91                          | 86                          |
| 3          | 5            | 50                                                | 15                                           | 6                                  | 70                          | 75                          |
| 4          | 6            | 100                                               | 20                                           | 8                                  | 72                          | 80                          |
| 5          | 6            | 200                                               | 20                                           | 4                                  | 87                          | 87                          |
| 6          | 4            | 100                                               | 20                                           | 4                                  | 87                          | 84                          |
| 7          | 6            | 100                                               | 20                                           | 4                                  | 72                          | 86                          |
| 8          | 6            | 100                                               | 10                                           | 4                                  | 71                          | 77                          |
| 9          | 5            | 250                                               | 15                                           | 6                                  | 95                          | 92                          |
| 10         | 6            | 200                                               | 20                                           | 8                                  | 86                          | 90                          |
| 11         | 5            | 150                                               | 15                                           | 2                                  | 80                          | 82                          |
| 12         | 6            | 100                                               | 10                                           | 8                                  | 69                          | 71                          |
| 13         | 4            | 100                                               | 10                                           | 8                                  | 84                          | 71                          |
| 14         | 6            | 200                                               | 10                                           | 4                                  | 86                          | 86                          |
| 15         | 3            | 150                                               | 15                                           | 6                                  | 95                          | 85                          |
| 16         | 6            | 200                                               | 10                                           | 8                                  | 83                          | 81                          |
| 17         | 4            | 200                                               | 10                                           | 4                                  | 96                          | 83                          |
| 18         | 7            | 150                                               | 15                                           | 6                                  | 75                          | 85                          |
| 19         | 4            | 100                                               | 10                                           | 4                                  | 85                          | 74                          |
| 20         | 5            | 150                                               | 25                                           | 6                                  | 86                          | 86                          |
| 21         | 5            | 150                                               | 15                                           | 6                                  | 85                          | 85                          |
| 22         | 4            | 200                                               | 20                                           | 8                                  | 95                          | 90                          |
| 23         | 5            | 150                                               | 15                                           | 6                                  | 86                          | 84                          |
| 24         | 4            | 100                                               | 20                                           | 8                                  | 86                          | 80                          |
| 25         | 5            | 150                                               | 15                                           | 6                                  | 86                          | 86                          |
| 26         | 4            | 200                                               | 10                                           | 8                                  | 93                          | 80                          |
| 27         | 5            | 150                                               | 15                                           | 6                                  | 86                          | 83                          |
| 28         | 5            | 150                                               | 15                                           | 10                                 | 78                          | 74                          |
| 29         | 5            | 150                                               | 5                                            | 6                                  | 80                          | 77                          |
| 30         | 5            | 150                                               | 15                                           | 6                                  | 86                          | 86                          |

**Table S4.** Analysis of the variance for the fitted quadratic polynomial model for the extraction of FLV and EMP.

| <b>Parameter</b>               | <b>FLV</b> | <b>EMP</b> |
|--------------------------------|------------|------------|
| <b>R<sup>2</sup></b>           | 0.9725     | 0.9531     |
| <b>Adjusted R<sup>2</sup></b>  | 0.9468     | 0.9093     |
| <b>Predicted R<sup>2</sup></b> | 0.8957     | 0.7684     |
| <b>Adeq Precision</b>          | 22.2695    | 18.0473    |

**Table S5.** Quantitative parameters of the developed method for the analytes.

| Parameter                  | FLV                                      | EMP                                      |
|----------------------------|------------------------------------------|------------------------------------------|
| LR (ng mL <sup>-1</sup> )  | 20.0 - 380.0                             | 5.0 - 300.0                              |
| R <sup>2</sup>             | 0.9986                                   | 0.9966                                   |
| LOD (ng mL <sup>-1</sup> ) | 6.3                                      | 1.5                                      |
| LOQ (ng mL <sup>-1</sup> ) | 19.2                                     | 4.6                                      |
| EF                         | 48                                       | 42                                       |
| ER (%)                     | 96                                       | 92                                       |
| Precision, RSD (%)         | Intra-day: 1.4–2.7<br>Inter-day: 1.1–2.2 | Intra-day: 2.1–3.2<br>Inter-day: 1.7–2.8 |

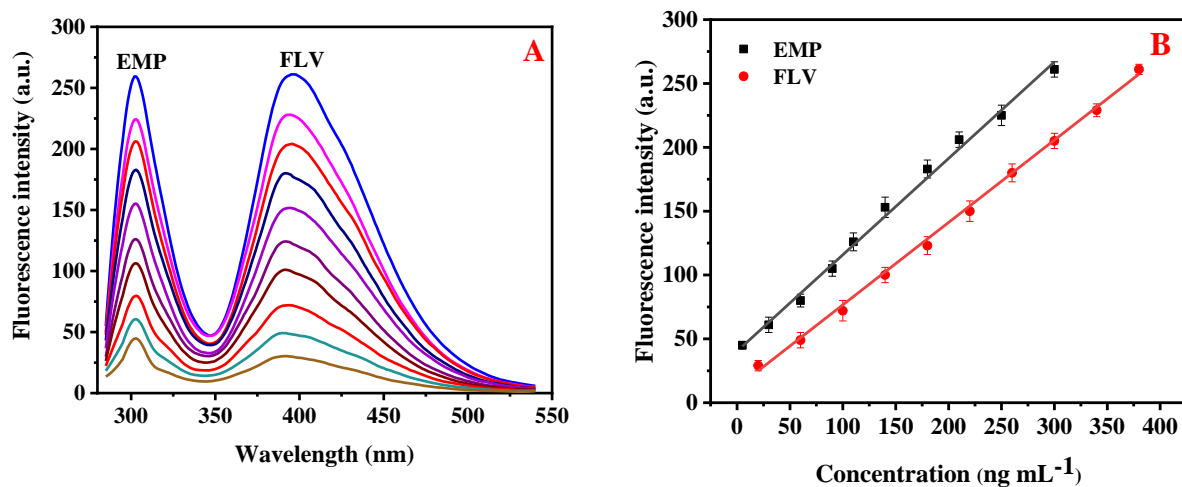

**Fig. S2.** (A) Fluorescence spectra for different concentrations of FLV and EMP in spiked water samples after NDES-DLLME, (B) the linear calibration curve.

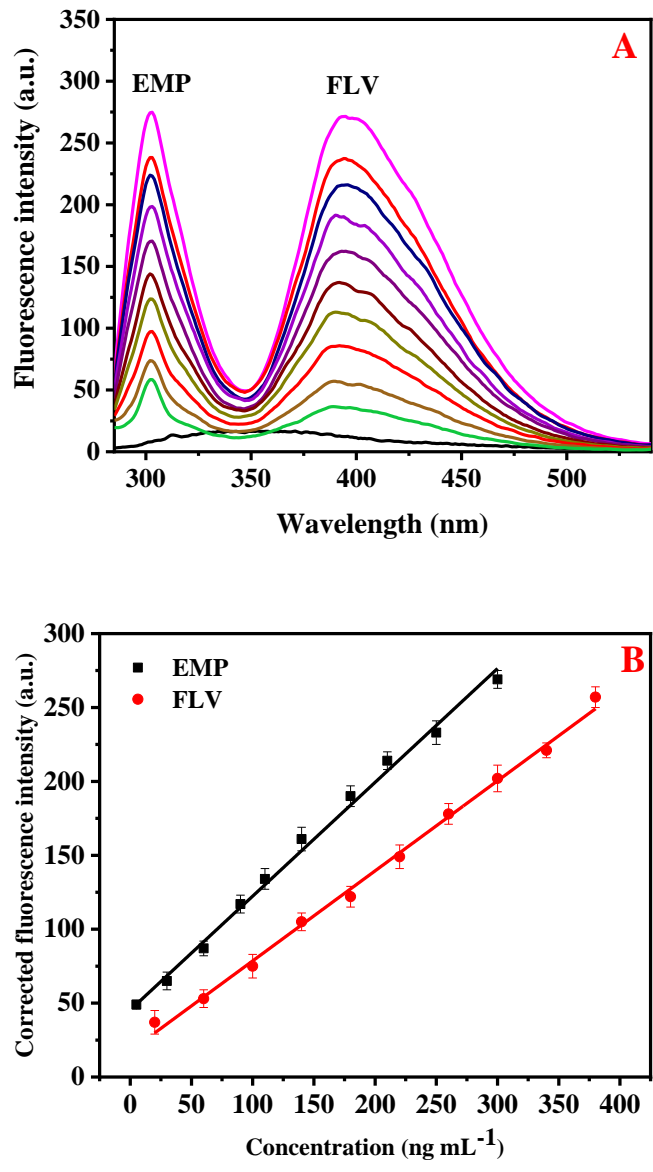

**Fig. S3.** (A) Fluorescence spectra for different concentrations of FLV and EMP in spiked plasma samples after NDES-DLLME, **Black line** represents blank plasma (B) the linear calibration curves.

**Table S6.** Relative recoveries (%) from analysis of FLV and EMP in plasma samples at optimum conditions (n=3).

| <b>Drug</b> | <b>Amount added<br/>(ng mL<sup>-1</sup>)</b> | <b>Amount found<br/>(ng mL<sup>-1</sup>)</b> | <b>Relative recovery<br/>(RR%)</b> | <b>RSD%</b> |
|-------------|----------------------------------------------|----------------------------------------------|------------------------------------|-------------|
| <b>FLV</b>  | 60.0                                         | 67.3                                         | 95.17                              | 2.12        |
|             | 180.0                                        | 184.2                                        | 96.67                              | 1.54        |
|             | 300.0                                        | 299.5                                        | 96.43                              | 3.21        |
| <b>EMP</b>  | 30.0                                         | 39.5                                         | 90.00                              | 2.70        |
|             | 110.0                                        | 109.9                                        | 88.54                              | 1.75        |
|             | 210.0                                        | 205.2                                        | 91.76                              | 2.81        |

Amount measured in the real sample (Blank) (at zero concentration of the studied drugs) = 10.2 ng mL<sup>-1</sup> for EMP and 12.5 ng mL<sup>-1</sup> for FLV.



**Table S7.** Selectivity of the proposed method for 100 ng mL<sup>-1</sup> of FLV and EMP in the presence of different ions and molecules (n = 3).

| <b>Ions and molecules</b>     | <b>FLV</b>                                      | <b>EMP</b>                                      |
|-------------------------------|-------------------------------------------------|-------------------------------------------------|
|                               | <b>Tolerable limit<br/>(ng mL<sup>-1</sup>)</b> | <b>Tolerable limit<br/>(ng mL<sup>-1</sup>)</b> |
| Ca <sup>2+</sup>              | 3500                                            | 4000                                            |
| K <sup>+</sup>                | 5000                                            | 3000                                            |
| SO <sub>4</sub> <sup>2-</sup> | 6000                                            | 5000                                            |
| CO <sub>3</sub> <sup>2-</sup> | 7000                                            | 6000                                            |
| Mg <sup>2+</sup>              | 3000                                            | 4000                                            |
| F <sup>-</sup>                | 5000                                            | 3000                                            |
| Cl <sup>-</sup>               | 5000                                            | 6000                                            |
| Lactose                       | 1400                                            | 1800                                            |
| Glucose                       | 1800                                            | 1900                                            |
| Zn <sup>2+</sup>              | 2500                                            | 2600                                            |
| Fe <sup>3+</sup>              | 3500                                            | 4500                                            |
| Tryptophan                    | 700                                             | 600                                             |
| Tyrosine                      | 800                                             | 900                                             |
| Phenylalanine                 | 900                                             | 800                                             |
| Vitamin A                     | 900                                             | 700                                             |
| Riboflavin                    | 600                                             | 800                                             |
| Creatinine                    | 800                                             | 900                                             |
| Pyridoxine                    | 500                                             | 1000                                            |

**Table S8.** Pharmacokinetic parameters of FLV after a single oral administration of EMP alone and after oral coadministration of EMP in the studied rabbits (mean  $\pm$  SD, n = 3)

| <b>Parameters</b>                          | <b>FLV alone</b>    | <b>FLV co-administered with EMP</b> | <b>P value*</b> |
|--------------------------------------------|---------------------|-------------------------------------|-----------------|
| $C_{\max}$ (ng mL <sup>-1</sup> )          | 250.2 $\pm$ 22.58   | 352.2 $\pm$ 20.11                   | 0.0057          |
| $T_{\max}$ (hr)                            | 1.5 $\pm$ 0.0       | 1.5 $\pm$ 0.0                       |                 |
| $K_e$ (hr <sup>-1</sup> )                  | 0.16 $\pm$ 0.024    | 0.090 $\pm$ 0.071                   | 0.0081          |
| $t_{0.5}$ (hr)                             | 4.27 $\pm$ 0.78     | 7.73 $\pm$ 0.96                     | 0.0045          |
| $K_a$ (hr <sup>-1</sup> )                  | 2.24 $\pm$ 0.42     | 2.52 $\pm$ 0.42                     | 0.058           |
| $t_{0.5a}$ (hr)                            | 0.31 $\pm$ 0.14     | 0.28 $\pm$ 0.42                     | 0.079           |
| $AUC_{0-24}$ (ng hr mL <sup>-1</sup> )     | 1343.0 $\pm$ 452.3  | 2576.25 $\pm$ 245.2                 | 0.0012          |
| $AUC_{0-\infty}$ (ng hr mL <sup>-1</sup> ) | 1367.08 $\pm$ 143.5 | 2896.39 $\pm$ 189.25                | 0.0040          |
| $MRT$ (hr)                                 | 6.99 $\pm$ 0.89     | 7.66 $\pm$ 0.77                     | 0.059           |

\*A difference was considered significant at  $P < 0.05$
